# Supplementary material for: New Normalized Difference Reflectance Indices for Estimation of Soil Drought Influence on Pea and Wheat
Source: MDPI journal article supplement (doi:10.3390/rs14071731), 2022-04-04
Supplement: s1 [file s1]

Archive with 3 entries (3 files):
- Figure S1.pdf
- Figure S2.pdf
- Figure S3.pdf
