# Supplementary material for: New Normalized Difference Reflectance Indices for Estimation of Soil Drought Influence on Pea and Wheat
Source: MDPI journal article supplement (doi:10.3390/rs14071731), 2022-04-04
Supplement: s1 [file s1]

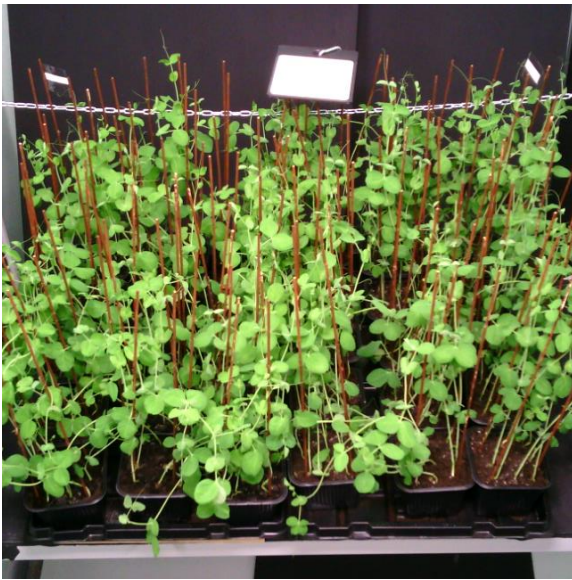

(a)

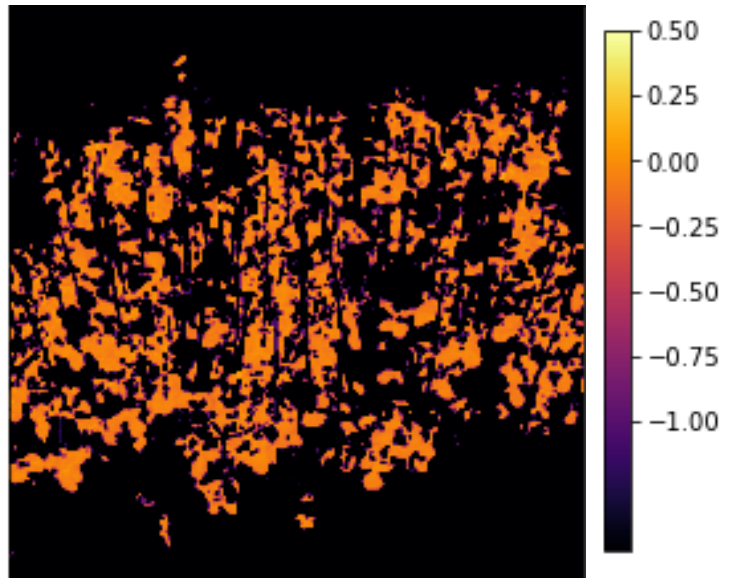

(b)

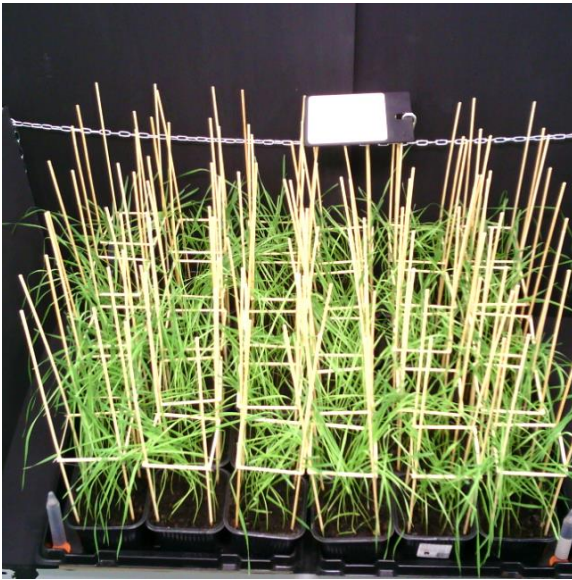

(c)

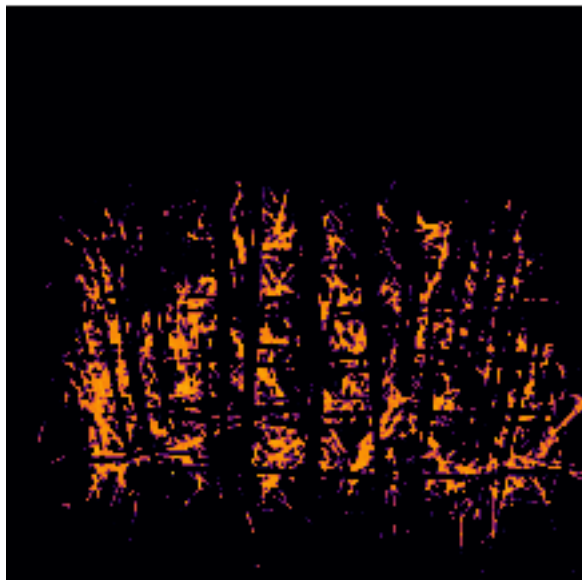

(d)

**Figure S3.** Examples of RGB image and pseudocolor RI image after excluding background. (a) RGB image of pea plants; (b) pseudocolor image of RI(670, 432) of pea plants; (c) RGB image of wheat plants; (d) pseudocolor image of RI(670, 432) of wheat plants. Plants cultivated in the vegetation room and measured at 45° angle to the ground plane ("side view") are shown.
