# Supplementary material for: New Normalized Difference Reflectance Indices for Estimation of Soil Drought Influence on Pea and Wheat
Source: MDPI journal article supplement (doi:10.3390/rs14071731), 2022-04-04
Supplement: s1 [file s1 › Figure S1.pdf]

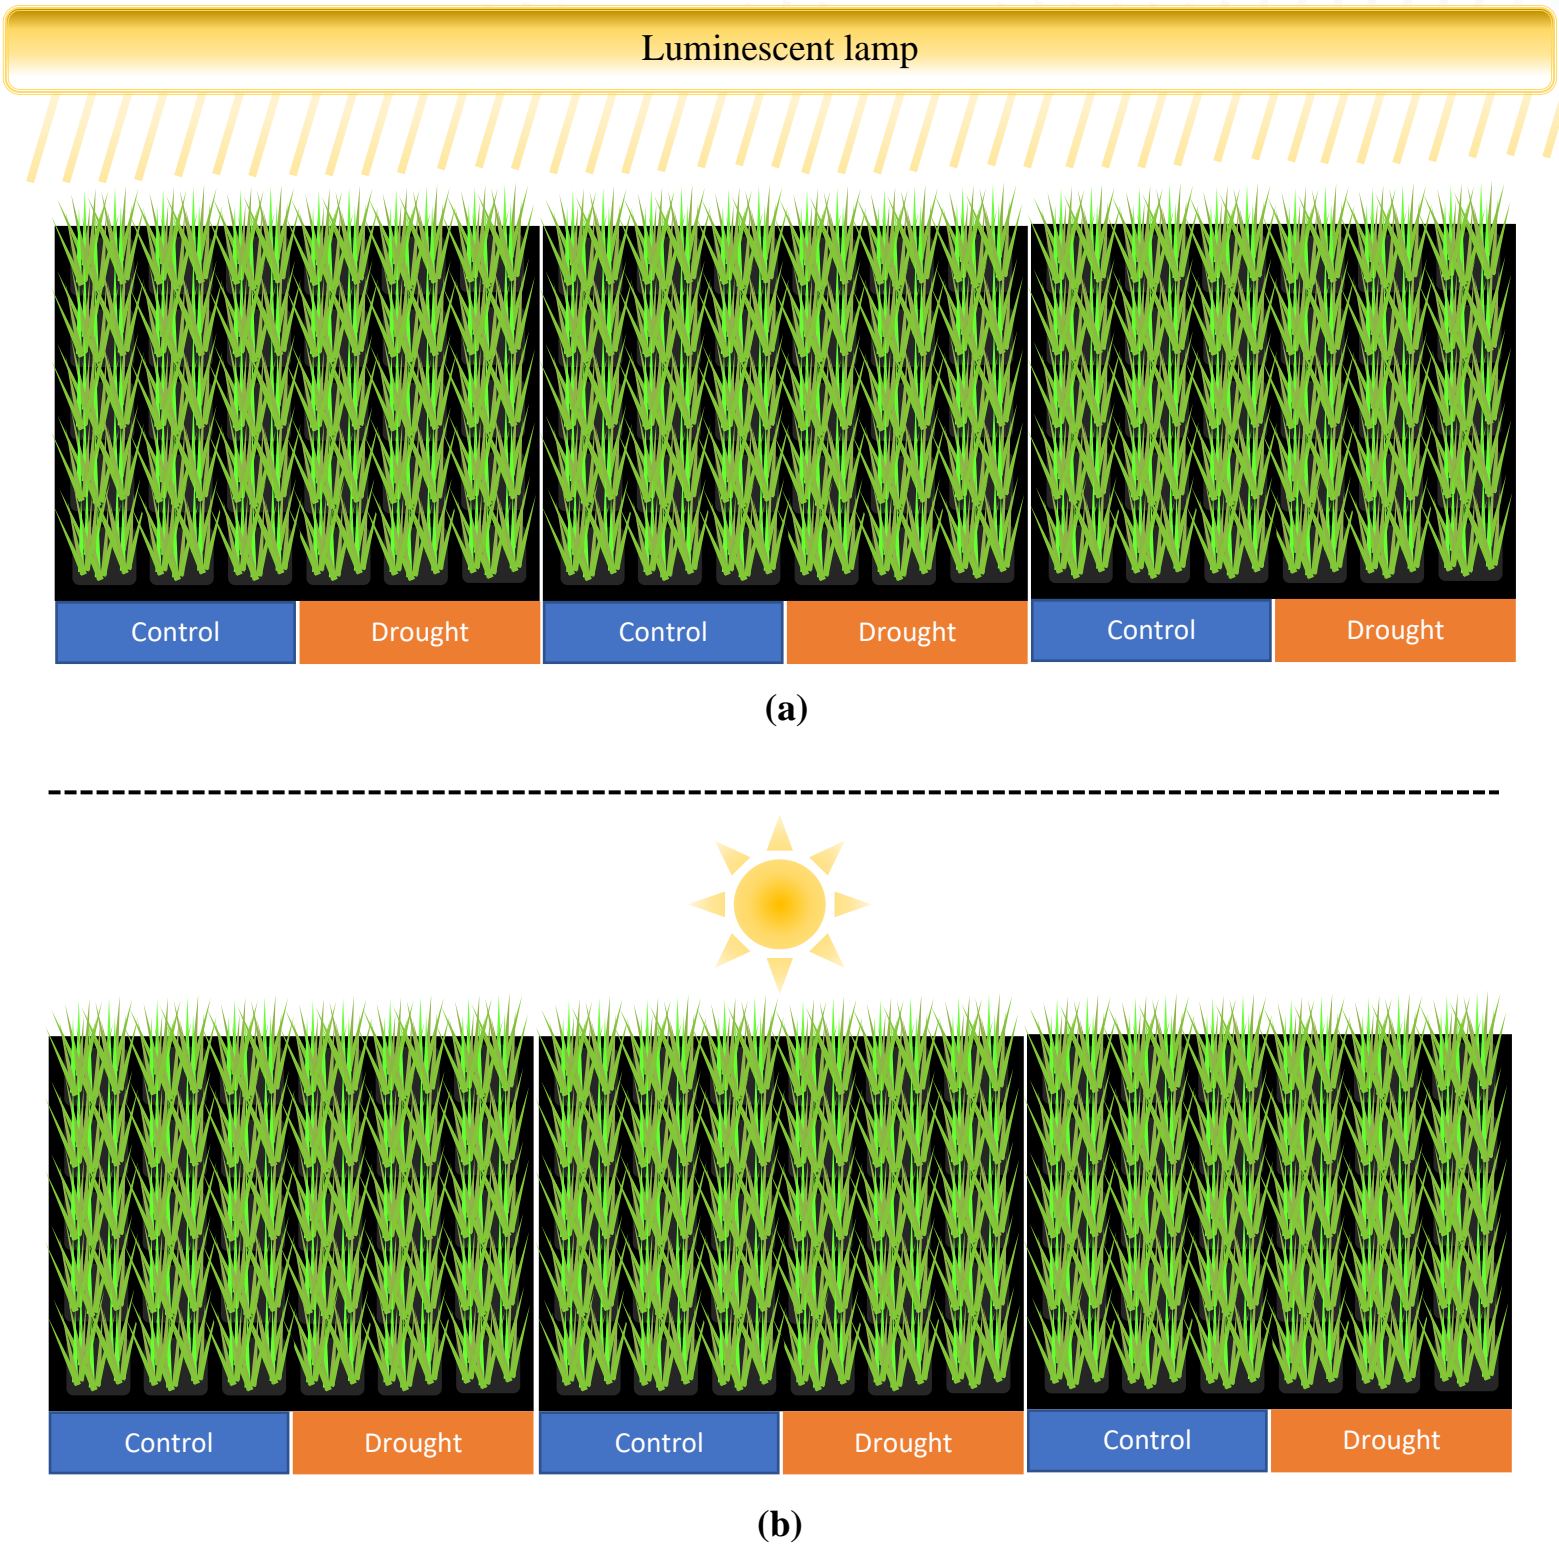

**Figure S1.** Schema of pots arrangement at the cultivation of plant in vegetation room **(a)** and under open ground conditions **(b)**. 30 pots (15 pots under control conditions and 15 pots under the soil drought) were placed in each pallet. Row including three pallets was used in each experiment.
