# Supplementary material for: New Normalized Difference Reflectance Indices for Estimation of Soil Drought Influence on Pea and Wheat
Source: MDPI journal article supplement (doi:10.3390/rs14071731), 2022-04-04
Supplement: s1 [file s1 › Figure S2.pdf]

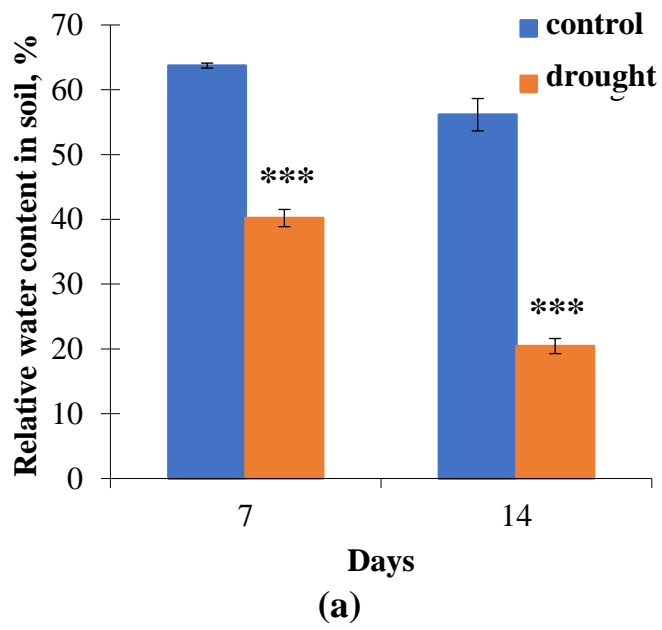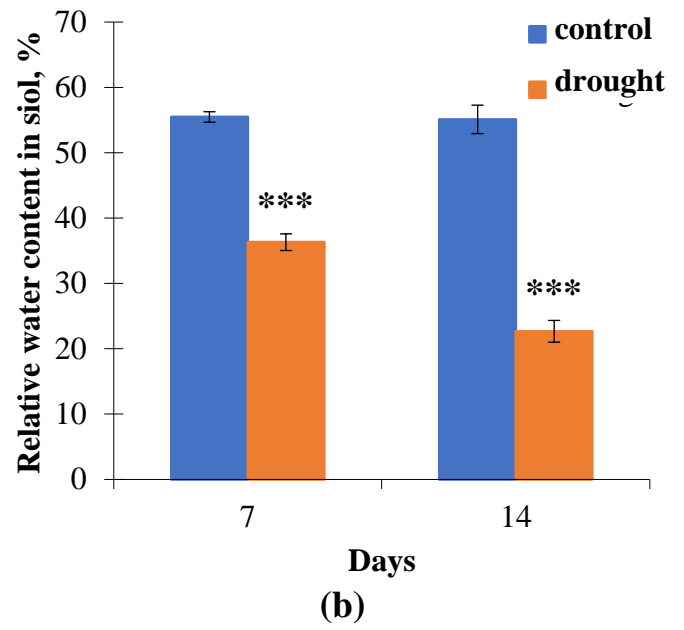

**Figure S2.** Changes in relative water content (RWC) in the soil at drought in vegetation room **(a)** and under open ground conditions **(b)** ( $n=6$ ). \*,  $p < 0.05$ ; \*\*,  $p < 0.01$ ; \*\*\*,  $p < 0.001$ .
